# Supplementary material
Source: PubMed Central journal article supplement (PMC6964299)
Supplement: ao9b02981_si_001.pdf [file ao9b02981_si_001.pdf]

# **Investigation of CNT/PPy modified carbon paper electrodes under anaerobic and aerobic conditions for phenol bioremediation in microbial fuel cell**

Nishat Khan<sup>1</sup>, Abdul Hakeem Anwer<sup>1</sup>, Anees Ahmad<sup>2</sup>, Suhail Sabir<sup>1</sup>, Surajbhan Sevda<sup>3</sup>,  
Mohammad Zain Khan<sup>1\*</sup>

<sup>1</sup>*Environmental Research Laboratory, Department of Chemistry, Aligarh Muslim University, Aligarh 202 002, UP, India*

<sup>2</sup>*Industrial Chemistry Research Laboratory, Department of Chemistry, Aligarh Muslim University, Aligarh 202 002, UP, India*

<sup>3</sup>*Department of Biosciences and Bioengineering, Indian Institute of Technology Guwahati, Guwahati, Assam-781039, India*

## **Supporting Information**

Figure S1 Voltage output at different phenolic concentrations for (a) bio-anodic and (b) bio-cathodic B-MFCs

Figure S2 UV/Vis spectra of phenol treatment using (a,b) bare carbon paper anodes (c,d) modified carbon paper anodes at 200 mg/L concentration for bio-anodic and bio-cathodic MFCs

Figure S3 EDX spectra of (a) bare (b) MWCNT/PPy coated carbon paper electrode (c,d) bio-anodic and bio-cathodic B-MFCs and (e,f) bio-anodic and bio-cathodic C-MFCs respectively

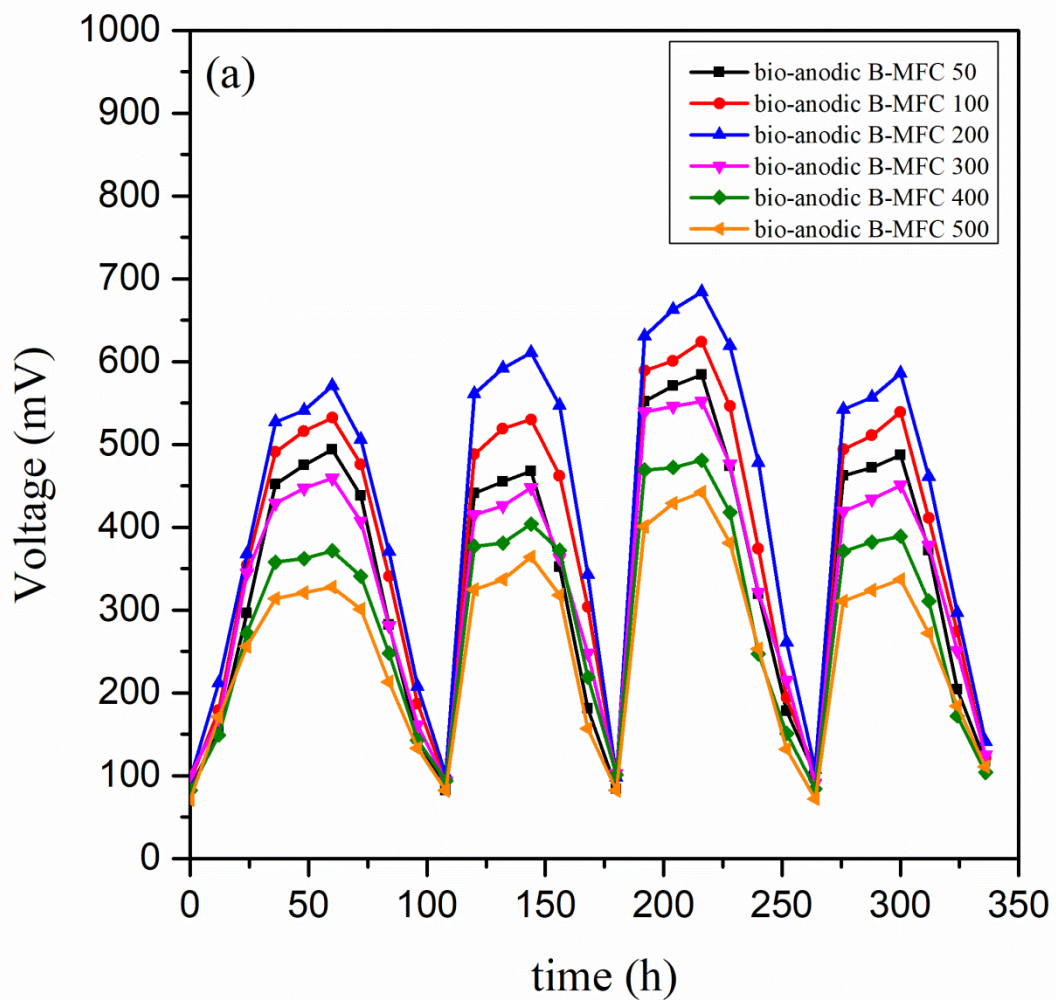

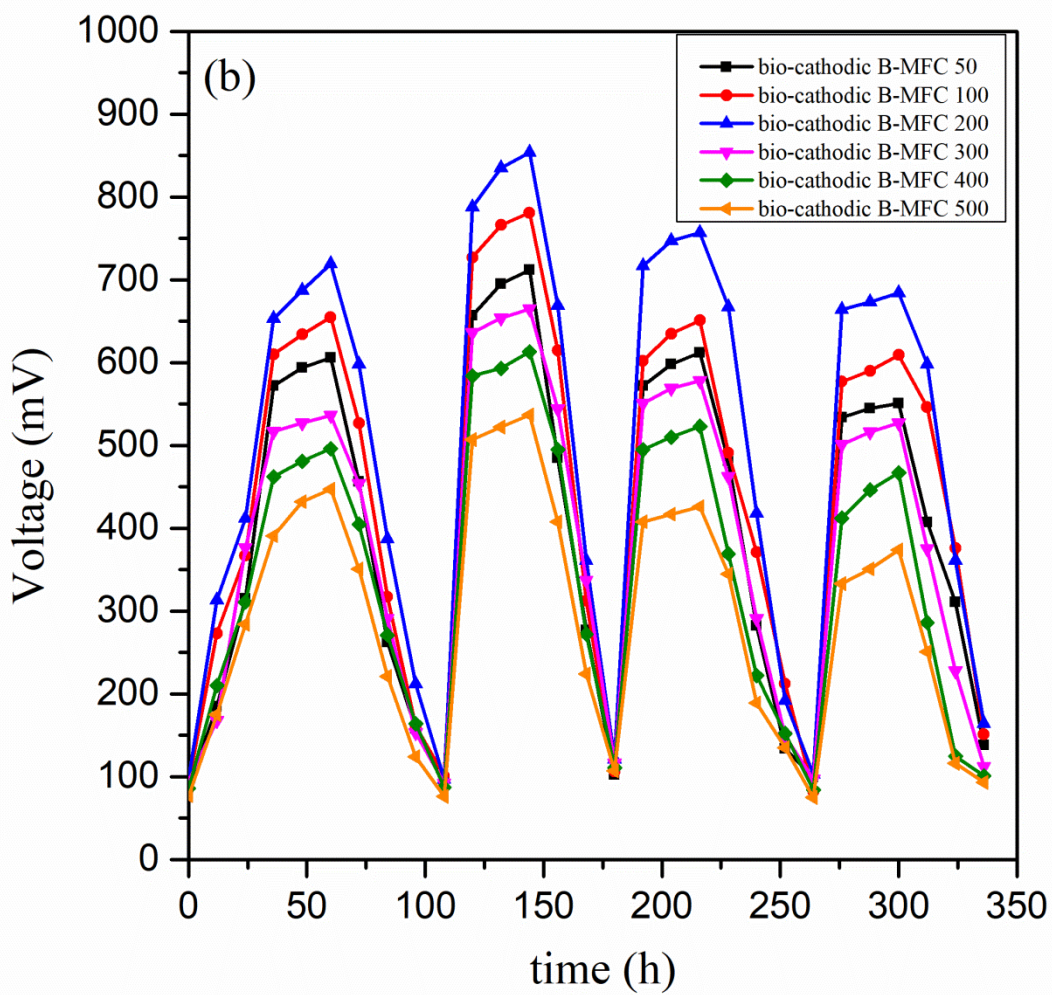

Figure S1 Voltage output at different phenolic concentrations for (a) bio-anodic and (b) bio-cathodic B-MFCs

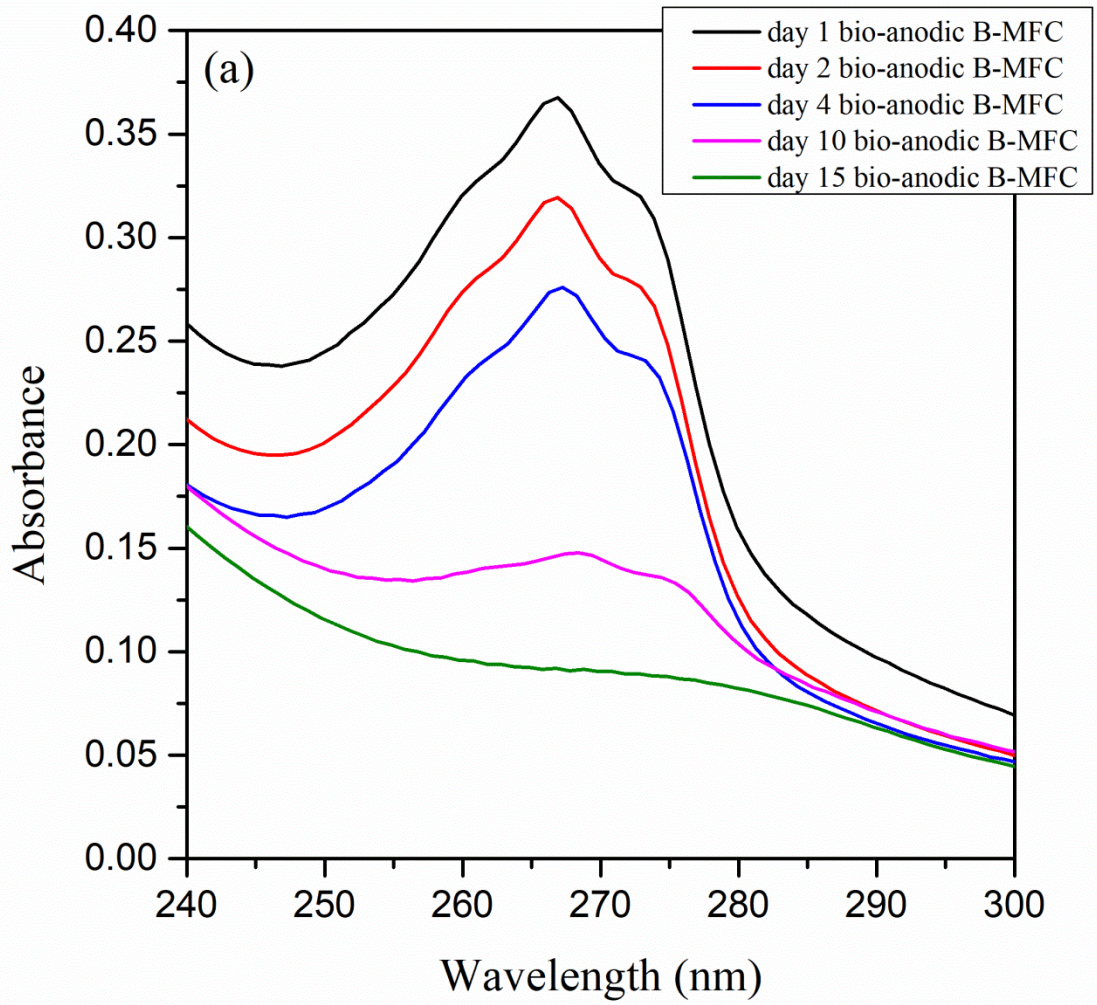



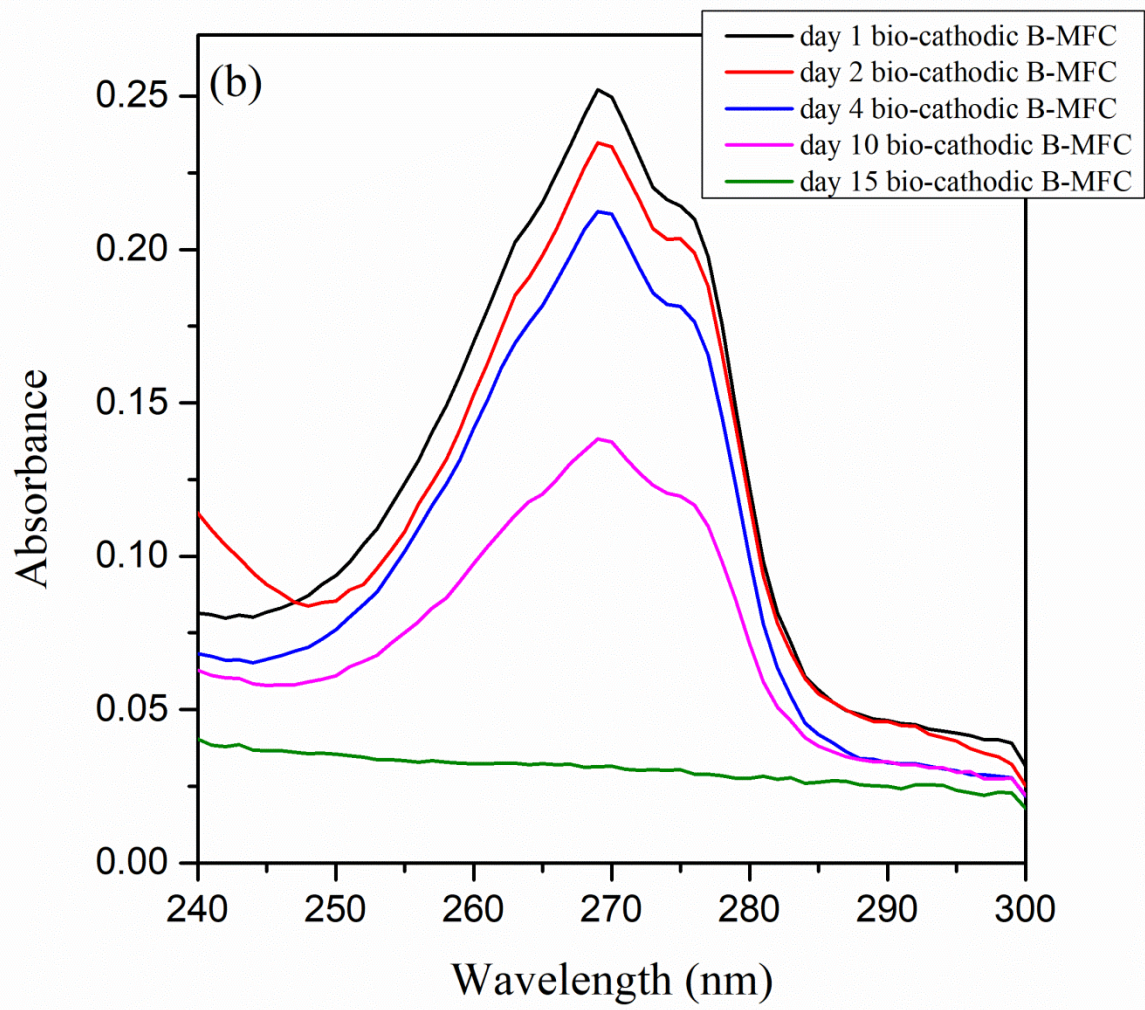

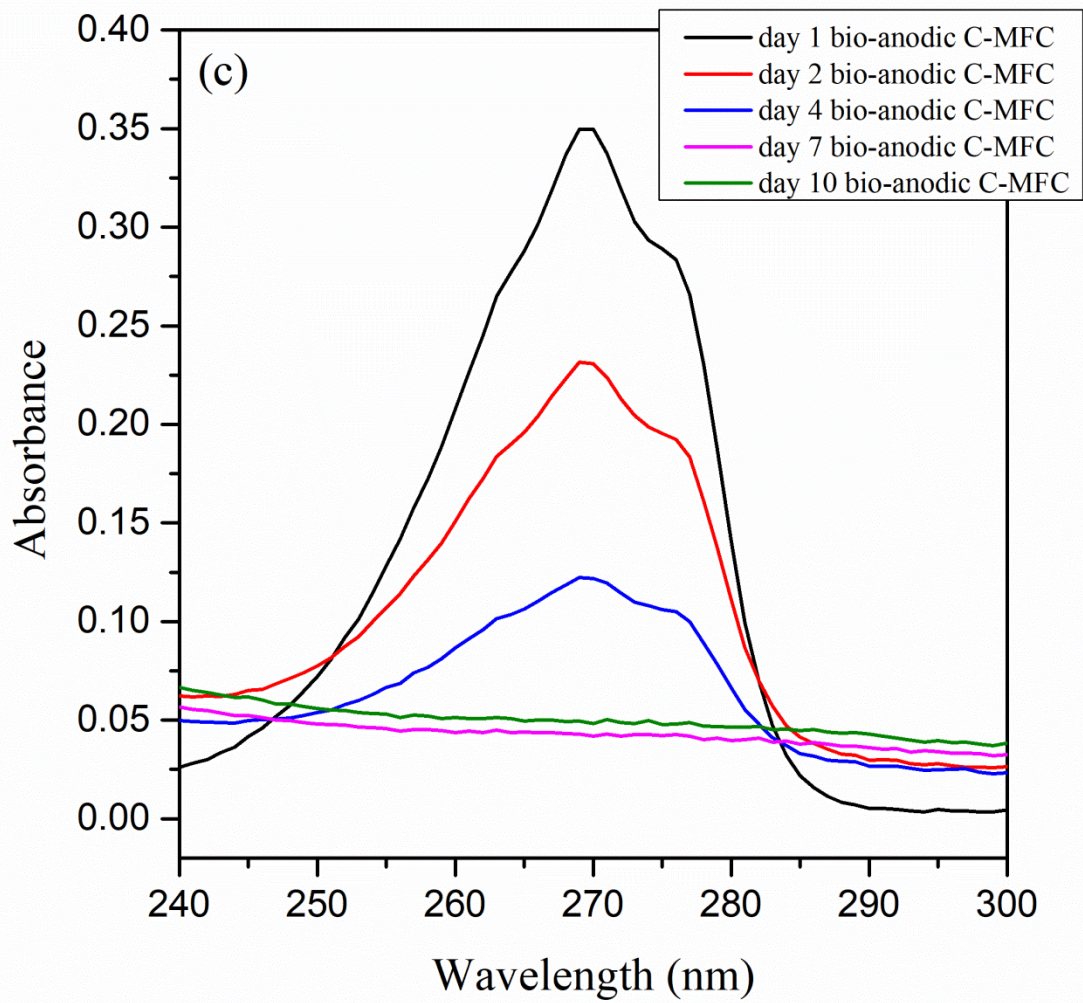



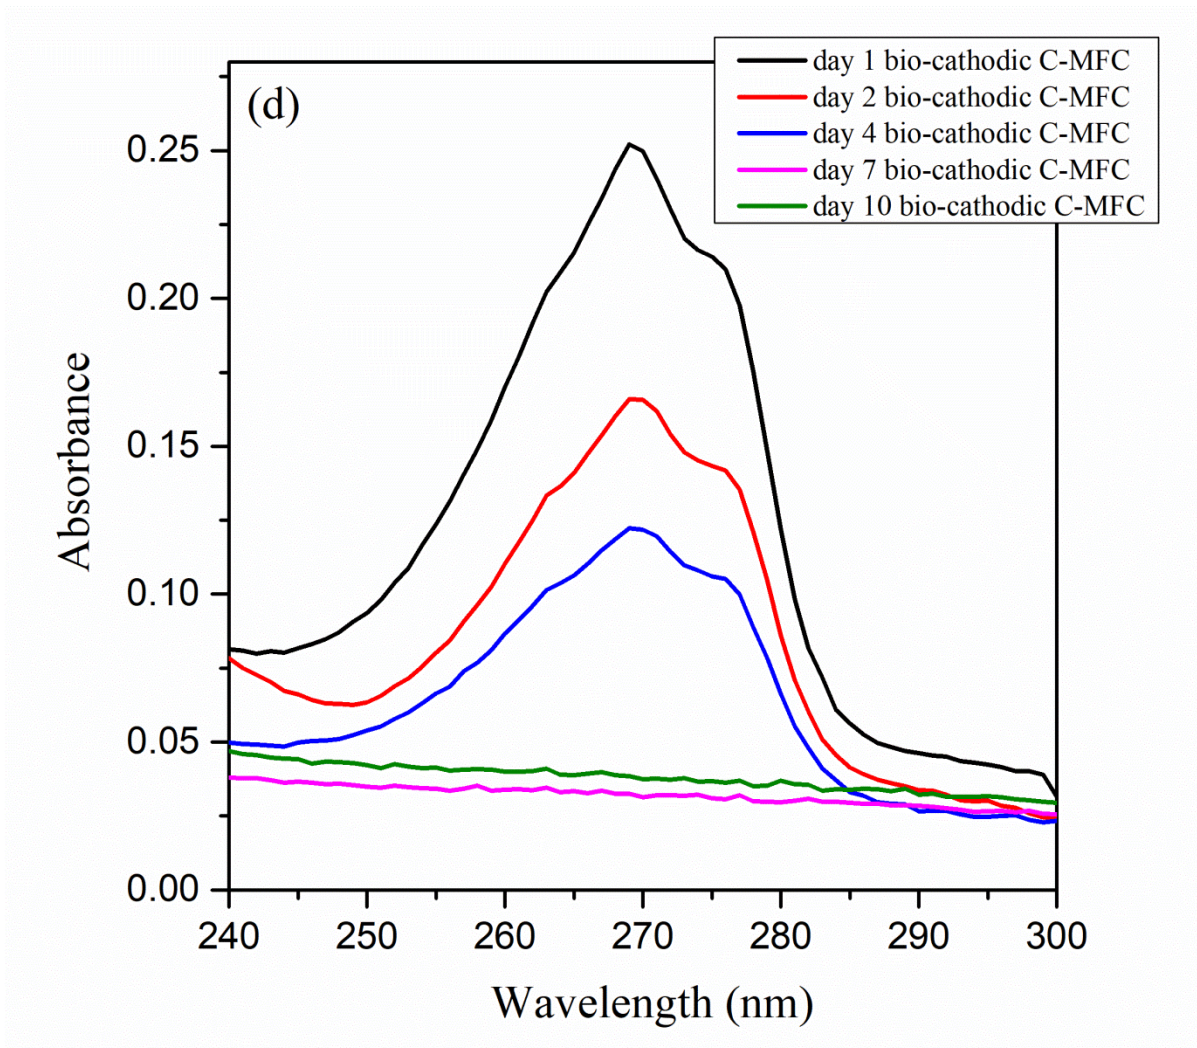

Figure S2 UV/Vis spectra of phenol treatment using (a,b) bare carbon paper anodes (c,d) modified carbon paper anodes at 200 mg/L concentration for bio-anodic and bio-cathodic MFCs

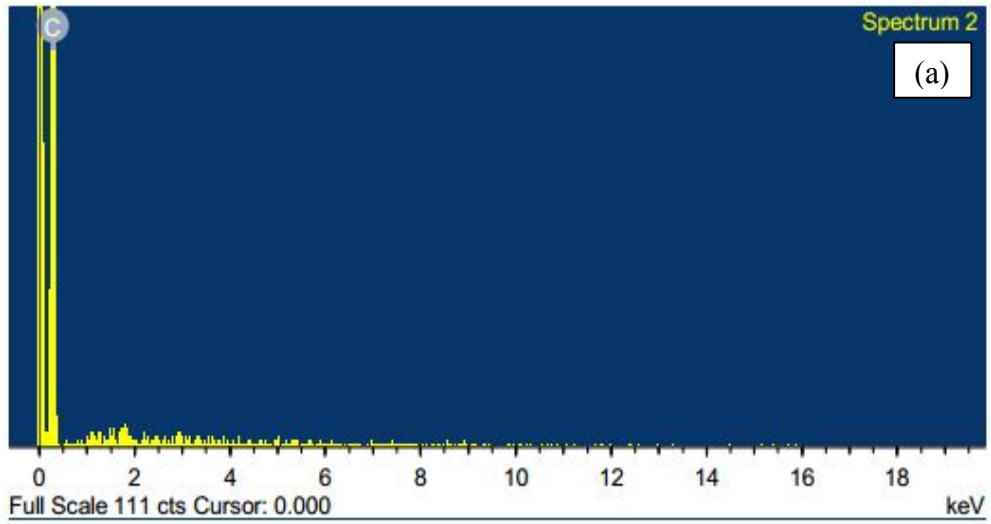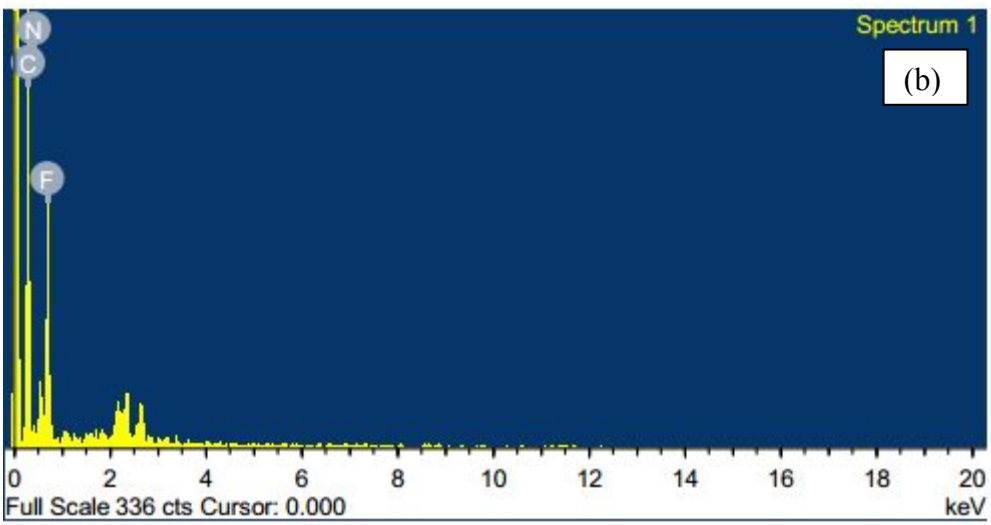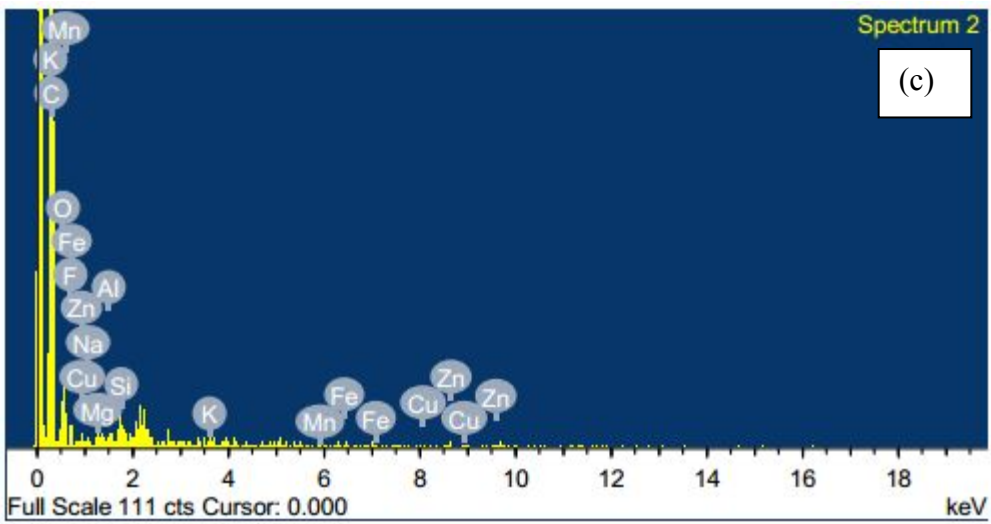



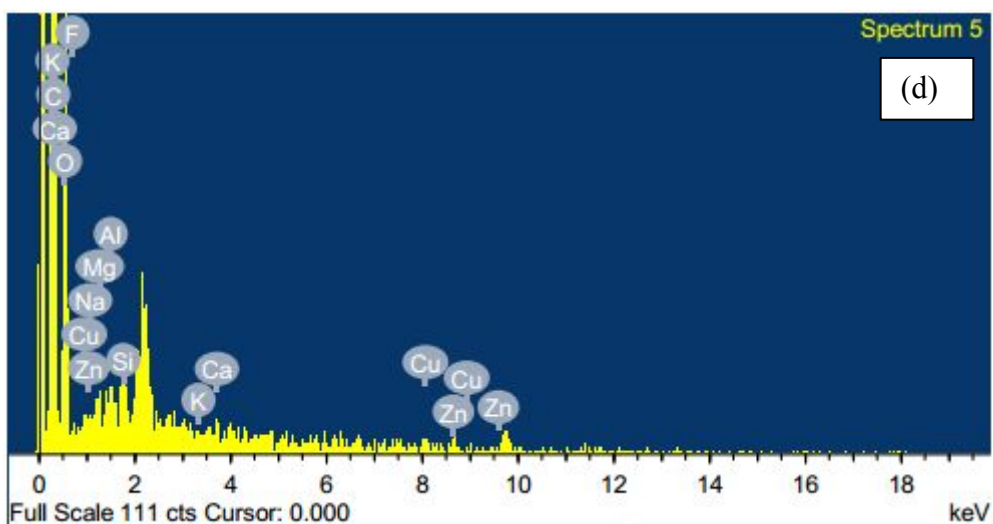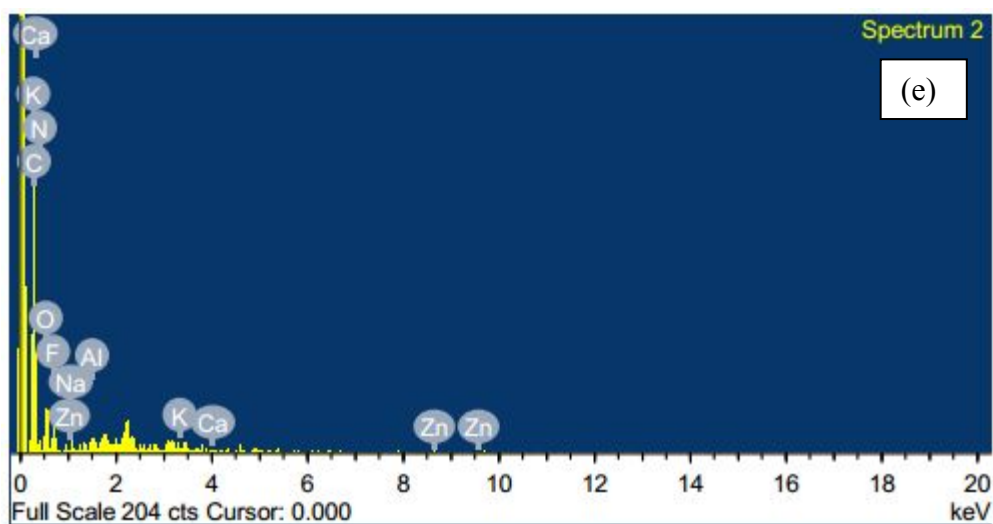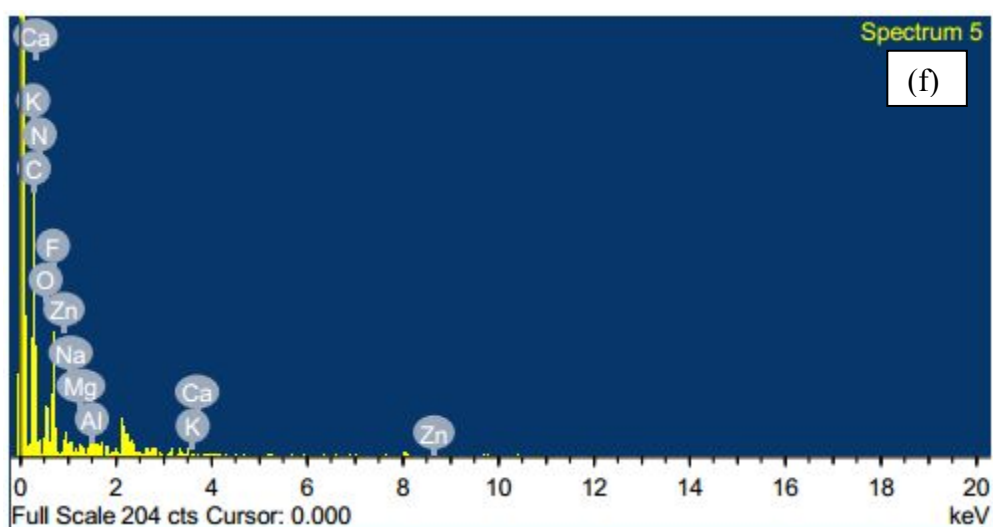

Figure S3- EDX spectra of (a) bare (b) MWCNT/Ppy coated carbon paper electrode (c,d) bio-anodic and bio-cathodic B-MFCs and (e,f) bio-anodic and bio-cathodic C-MFCs respectively
